# 1 Implementing the reuse of public DIA proteomics 2 datasets: from the PRIDE database to Expression 3 Atlas

4 Mathias Walzer<sup>1</sup>, David García-Seisdedos<sup>1</sup>, Ananth Prakash<sup>1</sup>, Paul Brack<sup>2</sup>, Peter  
5 Crowther<sup>3</sup>, Robert L. Graham<sup>4</sup>, Nancy George<sup>1</sup>, Suhaib Mohammed<sup>1</sup>, Pablo Moreno<sup>1</sup>,  
6 Irene Papathedourou<sup>1</sup>, Simon J. Hubbard<sup>2</sup>, and Juan Antonio Vizcaíno<sup>1</sup>

7 <sup>1</sup>European Molecular Biology Laboratory, EMBL-European Bioinformatics Institute (EMBL-EBI), Hinxton,  
8 Cambridge, CB10 1SD, United Kingdom.

9 <sup>2</sup>Division of Evolution and Genomic Sciences, School of Biological Sciences, Faculty of Biology, Medicine and  
10 Health, University of Manchester, Manchester Academic Health Science Centre, Oxford Road, Manchester M13  
11 9PT, United Kingdom.

12 <sup>3</sup>Melandra Limited, 16 Brook Road, Urmston, Manchester M41 5RY, United Kingdom.

13 <sup>4</sup>School of Biological Sciences, Chlorine Gardens, Queen's University Belfast, Belfast, BT9 5DL, United Kingdom.

14 \*Corresponding author(s): Mathias Walzer (walzer@ebi.ac.uk), Dr. Juan Antonio Vizcaíno (juan@ebi.ac.uk)

## 15 ABSTRACT

The number of mass spectrometry (MS)-based proteomics datasets in the public domain keeps increasing, particularly those generated by Data Independent Acquisition (DIA) approaches such as SWATH-MS. Unlike Data Dependent Acquisition datasets, the re-use of DIA datasets has been rather limited to date, despite its high potential, due to the technical challenges involved. We introduce a (re-)analysis pipeline for public SWATH-MS datasets which includes a combination of metadata annotation protocols, automated workflows for MS data analysis, statistical analysis, and the integration of the results into the Expression Atlas resource. Automation is orchestrated with Nextflow, using containerised open analysis software tools, rendering the pipeline readily available and reproducible. To demonstrate its utility, we reanalysed 10 public DIA datasets from the PRIDE database, comprising 1,278 SWATH-MS runs. The robustness of the analysis was evaluated, and the results compared to those obtained in the original publications. The final expression values were integrated into Expression Atlas, making SWATH-MS experiments more widely available and combining them with expression data originating from other proteomics and transcriptomics datasets.

## 17 Introduction

18 The availability of mass spectrometry (MS)-based proteomics datasets continues to increase dramatically, representing a  
19 growing and increasingly useful resource for the biomedical sciences. Indeed, this growth mirrors that found in other related  
20 omics fields such as transcriptomics, where re-use, re-analysis and new comparative studies can be facilitated<sup>1,2</sup>. The PRIDE  
21 (PRoteomics IDentifications) database<sup>3</sup> at the European Bioinformatics Institute (EBI, <https://www.ebi.ac.uk/pride/>) is the  
22 largest proteomics data repository worldwide and is one of the founding members of the ProteomeXchange consortium<sup>4</sup>. During  
23 2021 alone, PRIDE captured around 5,800 datasets, originating from a wide variety of species and different experimental  
24 approaches.

25 One of the main benefits of making data publicly available is to enable reuse and increases reproducibility, facilitating an  
26 independent assessment of the results described in the corresponding publications. This represents an auditable route to (re)trace  
27 the source of key findings as well as supporting the potential discovery of new findings as new advanced software becomes  
28 available. The growth in public domain proteomics data has indeed triggered data reuse activities<sup>5,6</sup> and new applications in the  
29 field, including among others, numerous meta-analysis studies, proteogenomics applications and the use of artificial intelligence  
30 approaches such as machine-learning<sup>7,8</sup>. Expression Atlas (<https://www.ebi.ac.uk/gxa/home>) is an added-value resource at  
31 the EBI that enables easy access to integrated information about gene and protein expression across species, tissues, cells,  
32 experimental conditions and diseases<sup>9</sup>. The Expression Atlas (EA) 'bulk' database has two sections: baseline and differential,  
33 and already integrates some proteomics data. This data has been generated from reanalysis of human, mouse, rat and cell-line  
34 public datasets, all of which have been derived from Data Dependent Acquisition (DDA)<sup>9-11</sup>. The availability of such results in  
35 EA therefore supports the integration of proteomics with transcriptomics information.

36 To date, only DDA-based proteomics datasets have been reanalysed and integrated in EA. However, an increasing fraction

37 of data deposited in public repositories comes from DIA (Data Independent Acquisition) approaches and from SWATH-MS  
38 (Sequential Window Acquisition of All Theoretical Mass Spectra) methods in particular. DIA methods differ from DDA  
39 techniques in that no narrow-window ion selection takes place in the mass spectrometer. As a result, fragment ion spectra  
40 of all the available peptide ion species in a wide window are produced. In the case of SWATH-MS, this is conducted in  
41 cycles of sequential windows of  $m/z$  (mass-to-charge) values<sup>12,13</sup>, creating permanent digital maps of the protein samples  
42 via the precursor and fragment ions of their proteolytic peptides. These digital maps can potentially be re-interrogated over  
43 time<sup>13-16</sup>, for instance with novel spectral libraries including additional peptides. This holds great promise for biomarker  
44 discovery and other applications, especially since DIA approaches can have distinct advantages for quantitative proteomics  
45 studies. For instance, high reproducibility between technical and biological replicates<sup>17</sup>, and high intra- and inter-laboratory  
46 reproducibility<sup>18</sup>. As a result, SWATH-MS methods can capture a comprehensive picture of the sample measured and have  
47 established themselves as a reproducible method for large-scale protein quantification.

48 Despite this great promise, SWATH-MS analysis pipelines are complex and involve multiple stages and parameters.  
49 Typically, the  $m/z$  space per cycle is segmented into a set of acquisition windows, within which the analysis software attempts  
50 to detect signals from a library of expected peptides provided in a spectral library. Depending on the instrument speed, target  
51 acquisition  $m/z$  range and gradient length, either 32 or 64 equally sized windows are used, though this can vary from study  
52 to study, and dynamically sized windows are also often used. Similarly, the methods used to detect, score and statistically  
53 validate the underlying peptide-associated mass spectral features (i.e., co-eluting ion group signals from different transitions)  
54 can vary greatly between studies, and depend on the data analysis software used. This task is often accomplished via a targeted  
55 approach where peptides from a spectral library are searched for in the digital map using a look-up table of precursor ion  
56  $m/z$  values, expected fragment ions ( $m/z$ ,  $c$ ), and a given retention time (RT) range when they elute off a column. These are  
57 usually empirically determined on the same or a similar instrumentation and settings, generated via DDA data from pooled or  
58 representative samples. At present, despite some notable exceptions (<sup>15,19-21</sup>), sample/study specific target spectral libraries are  
59 rarely deposited alongside the original SWATH-MS data in public repositories such as PRIDE. Additionally, the availability of  
60 the spectral libraries in different (custom) formats make them often difficult to adapt for reanalysis. In 2014, a pan-human target  
61 library comprising 10,000 proteins was published<sup>15</sup>, covering 50.9% of the annotated human proteins in UniProtKB/Swiss-Prot.  
62 These targets can be used more generally as their normalised RTs are reported and additional SWATH-MS studies can be  
63 normalised to the same scale, usually by the inclusion of known iRT peptides<sup>22</sup>. However, the use of a generic target library  
64 requires an appropriate statistical control of peptide and protein error rates<sup>23</sup>.

65 This robustness of the overall SWATH-MS approach has been demonstrated several times, notably in a benchmarking  
66 comparison of DIA software tools which observed very similar qualitative and quantitative results<sup>24</sup>. Although such studies show  
67 that DIA methods are a powerful approach for reproducible protein quantification, as highlighted above, their reuse is at present  
68 very limited. This stems from the practicalities of deploying a data analysis pipeline, due to either the large amounts of data to  
69 be processed, the huge computational efforts needed, the intricate software settings necessary, or the uncertainty about whether  
70 the data from a particular study is adequate for reanalysis in a different research setting. In this study, we provide a robust open  
71 reanalysis pipeline for DIA data and demonstrate its utility to confidently reanalyse ten public human DIA datasets obtained  
72 from PRIDE. Furthermore, the resulting quantified proteins are subject to further statistical analysis and the resulting protein  
73 expression data is integrated into Expression Atlas for widely available access. To the best of our knowledge, this is the first  
74 time that public DIA data has been systematically reanalysed and integrated with gene expression information. We demonstrate,  
75 that with well-formed experimental design annotation and (known) iRT peptide spiked data, it is possible to reanalyse public  
76 DIA data in a generic context, making it available to the community at <https://github.com/PRIDE-reanalysis/DIA-reanalysis>.

## 77 Results

### 78 Open analysis pipeline for DIA data

79 The reanalysis pipeline represents a harmonised combination of metadata annotation protocols, open proteomics software  
80 tools for SWATH-MS data in computational workflows orchestrated by Nextflow<sup>25</sup> which can be run in multiple compute  
81 environments, and data integration procedures. Figure 1 illustrates the distinct parts of the overall pipeline process. The pipeline  
82 integrates all the necessary steps in SWATH-MS data analysis ranging from data curation, raw data conversion, through to  
83 statistical analysis and data integration procedures for submission into EA. Software for the different steps of each part of the  
84 pipeline are fully containerised (Table 3), making a version update to individual tools more straightforward. A new container  
85 including an updated version of a given tool can be provided through the same parameter file used to change parameter settings  
86 e.g., a FDR (False Discovery Rate) threshold for peak group detection.

87 To add flexibility, the pipeline was split into four parts. The first (Figure 1a), includes dataset curation and acquisition, and  
88 the second (Figure 1b) contains the upstream analysis of the SWATH-MS raw data, automated with a Nextflow workflow. The  
89 third (Figure 1c), provides downstream statistical analysis, and is also automated with Nextflow, and a fourth part (Figure  
90 1d) contains an internal workflow for the integration of the results into Expression Atlas. The split has the advantage that

91 the analysts can inspect intermediate results before initiating the following part of the pipeline. For example, the second part  
92 contains an extra step to produce Quality Control/Assurance (QC/QA) records for each MS run, which could be inspected  
93 prior to initiating subsequent steps of the pipeline. This was particularly helpful in assessing potentially incorrect iRT peptide  
94 detection in a newly reanalysed dataset. An example for such assessment with the resulting exclusion from further analysis  
95 can be found in the Supplementary Material (Supplementary Figure S1). Optional entry points for the SWATH-MS raw  
96 data analysis workflow were added for datasets already analysed with OpenSWATH and for pre-processed spectral libraries  
97 (Supplementary Figure S2). Further details on the pipeline methods and availability can be found in the 'Methods' and 'Code  
98 availability' sections, respectively.

### 99 **Reanalysis of public DIA datasets**

100 Ten PRIDE public datasets, amounting to 1,278 individual SWATH-MS runs (Table 1), were reanalysed as explained in  
101 the 'Methods' section, using the EBI High Performance Computing (HPC) infrastructure. The CAL (Combined Assay  
102 Library) spectral library (SWATHAtlas accession number SAL00031) was used for all except the 'Plasma' dataset (for which a  
103 plasma-targeted library was preferred, see 'Methods' section).

104 The accumulated processing time for all datasets was around 19,000 CPU core hours, which amounted to approximately  
105 2,200 CPU core hours (equivalent to the time that computation would take on a single core) per dataset, or 15 CPU core hours  
106 per SWATH-MS run, on average.

107 We first compared the raw numbers of inferred proteins across three distinct levels of protein FDR: 5%, 1% and 0.1%,  
108 filtering on the q-values from the pyProphet FDR estimates for global protein level. Overall, the numbers of detected proteins  
109 were generally in the expected range for an analysis performed with mammalian cells/tissues, using the (generic) CAL target  
110 spectral library and for protein FDR levels of 1% (Figure 2a). At a 1% cut-off for example, just under 3,000 quantified  
111 proteins were reported for PXD003497 (with 2,754) and for PXD004691 (with 2,872). Both datasets are prostate cancer  
112 sample datasets. On the higher side, PXD004589 (another prostate cancer sample dataset) yielded 3,703 detected proteins,  
113 PXD004873 (hepatocellular cancer) 3,530 proteins, and PXD010912 (human liver S9 fractions) 4,224 detected proteins. There  
114 were two datasets where fewer proteins were detected: 2,239 in PXD014194, a breast cancer dataset containing only tumour  
115 tissue measurements, and as expected, a much lower number was found in the plasma dataset PXD001064 (207 proteins).  
116 Additionally, two datasets showed many more detected proteins than the others: 5,946 in PXD014943, a lymphoma sample  
117 dataset, and 7,097 in PXD003539, the NCI-60 cell-line dataset containing samples that contributed to the design of the CAL.  
118 The FDR threshold of 1% on a global level appeared to be a good trade-off. Results for stricter and more generous cut-offs are  
119 shown in Figure 2A for comparison. We note that use of a stricter filter at 0.1% FDR proved impractical, as for the plasma  
120 dataset PXD001064 the analysis failed to complete successfully.

121 To check the broad reliability of the open reanalysis pipeline combined with a generic spectral library, we compared  
122 our results with the originally published ones. We further implemented a consistency filter to remove unreliable protein  
123 identifications, in common with best practice in many of the published studies. Proteins or protein groups with more than  
124 50% of target features missing within the MS runs across a study group were removed. We note here that an informed and  
125 consistent comparison between the original (as published) and reanalysed protein numbers across all studies is essentially  
126 impossible, since among other reasons, the original reported studies used slightly different consistency filter approaches or  
127 FDR thresholds. On one hand, for 6 of the 10 studies considered, after reanalysis, the number of proteins was higher than those  
128 originally reported. In 4 of them, the numbers were markedly higher (Figure 2b). This is likely due to the protein numbers  
129 for dataset PXD000672 and PXD004873 being originally reported at a 0.1% protein level FDR, at a 0.1% peptide level FDR  
130 for PXD004589. Additionally, PXD014149 was originally analysed with a target library of 3,284 proteins. In the case of  
131 PXD010912 we assume fewer proteins were present in the original spectral library (not reported in the original publication)  
132 as well, as the authors reported that only 580 proteins were quantified via DDA. The Supplementary Material to the original  
133 publication of PXD003539 offers 6,556 protein groups with missing values quantified, a much closer value to the results of the  
134 reanalysis.

135 On the other hand, the protein numbers of 4 studies were lower than those originally published: around 300 proteins less in  
136 all cases with the exception of dataset PXD003497, where a difference of just under 1,000 proteins was found. Interestingly,  
137 this last study was originally analysed with CAL, albeit customised with additional DDA measurements, obtaining 6,800  
138 proteins. However, the authors subsequently reduced their set of proteins to 3,700 applying a more stringent consistency filter  
139 (at least two concordant proteotypic peptides<sup>26</sup>), which is more in line with our reanalysis.

140 All protein expression results are available via Expression Atlas (for URLs see Table 1). Source numbers are available in  
141 Supplementary Table S3. Intermediate results are available through the pipeline repository (see Supplementary Table S4).

### 142 **Baseline expression analysis - Technical validation**

143 To validate the internal consistency of the reanalysed results, we calculated the coefficient of variation (CV) from the quantitative  
144 values within the respective study groups' technical replicates and in total, comparing them to the original CVs, where available.

145 Three of the original datasets included technical replicates and in the corresponding publication the authors reported protein  
146 intensities at a MS-run level, which are necessary to calculate the CV (Table 2). One publication reported only sample averages,  
147 and one included only pooled-sample replicates, preventing a more comprehensive CV comparison. The overall median CV  
148 was generally below 21% and the CV values obtained from the reanalyses were similar to the originally published CVs.

149 The group-wise comparison showed a similar picture to the overall median CV comparison (Figure 3), although remaining  
150 in a very similar range, and were in one instance slightly smaller (Figure 3e). Again, this demonstrates the consistency of  
151 the reanalysis pipeline to reproduce the global characteristics of measurement variance observed in the original studies. To  
152 further compare the results of the reanalyses with the originally published results, we analysed the MS run-wise correlation of  
153 previously published protein abundances versus the equivalent results of the reanalyses for the technical replicates (Figure 4).  
154 The reanalysis results showed a high correlation with the original studies, though markedly closer to the regression line at a  
155 higher abundance and a wider distribution towards the lower intensities – as it might be expected. The Pearson product-moment  
156 correlation coefficients (R) ranged between 0.9 and 0.98 with a p-value  $\leq 0.001$ , demonstrating a high concordance between  
157 the original and the reanalysed protein quantitative data overall, with matched technical reproducibility.

158 However, when comparing the correlation of the reanalysis results with the original results on a per-MS run pairing  
159 (reanalysis versus original results) basis, the correlations between matched protein expression values were less pronounced (R  
160 values were between 0.52 and 0.84, see Supplementary Figure S3). This is consistent with the challenges in matching the exact  
161 protein identification parameters and highlights the inherent difficulties in implementing DIA reanalyses in general.

## 162 Differential Expression Analysis

163 Additionally, we also performed a downstream differential expression analysis for the three datasets that reported such values in  
164 the original publications: datasets PXD000672, PXD004691 and PXD014943. The programming language R<sup>27</sup> and MSStats<sup>28</sup>  
165 were used for the differential statistical analysis (see details in the 'Methods' section). For consistency, we used the default  
166 MSstats settings (except for the use of median normalisation and the 'top3' protein inference method). Regardless, substantial  
167 differences were found when compared with the original studies, though the number of differentially expressed proteins were in  
168 the same general order.

169 We calculated the correlation between the originally reported fold-changes and our reanalysis fold-changes (see Supple-  
170 mentary Figure S4). There was a substantial overlap of quantified protein expression values between the originally reported  
171 results and the reanalysed ones, ranging from 2,992 proteins (out of 4,572 protein fold-changes) in the reanalysis of the  
172 PXD014943 eDLBCL-PCNSL contrast, to 863 proteins (out of 1,868 protein fold-changes) in the reanalysis of the PXD000672  
173 benign-ccRCC contrast. The higher ratio of overlap in PXD014943 also showed the highest correlation (R value at 0.84),  
174 whereas the lowest also shows the smallest correlation R value of 0.52. This illustrates that the protein signals detected were  
175 generally in the same order of magnitude yet showing a varying amount of overlap and correlation. It also hinted at an increased  
176 number of protein signals of lower intensity, that differed between the analyses to a greater extent, being picked up as the  
177 number of quantified proteins increase, and in turn reducing the overall concordance. Accordingly, when drawing a cut-off for  
178 adjusted p-values ( $< 0.05$ ) and fold-changes ( $> 2$ ), the overlap between the original and the reanalysed results was reduced  
179 further. For the PXD014943 eDLBCL-PCNSL contrast, we found 118 proteins to be significantly differentially expressed  
180 overlapping in 21 proteins with the original study's 97 proteins significantly expressed (see Supplementary Table S1). The  
181 overlap of proteins of significance between original results and the reanalysed results was more pronounced in the PXD000672  
182 benign-ccRCC contrast, with 59 of the 262 proteins from the reanalysis matching with the originally reported 613 proteins  
183 (see Supplementary Table S1). We also encountered an instance of no overlap in PXD004691 normal(ff)-PrC(ff) contrast  
184 from the 3 proteins of significance originally reported and the 8 proteins detected from the reanalysis. The corresponding  
185 protein expression values were exported into Expression Atlas as explained in the 'Methods' section. See details about the  
186 corresponding datasets in Table 1. Of note, the analysis with the MSstats default protein inference setting of 'all' (instead of  
187 'top3') resulted in a far fewer number of significantly differentially expressed proteins. Here, the intensity correlations between  
188 originally reported protein abundance values and the reanalyses (Supplementary Figure S4) revealed an unexpected lack of  
189 correspondence.

## 190 Discussion

191 The popularity of DIA approaches in the proteomics field is increasing. However, to date, data reuse of public DIA datasets has  
192 been limited to mainly benchmarking studies (for example [<sup>29,30</sup>]). This is somewhat surprising given one of the principal  
193 advantages of SWATH-MS is to generate a permanent and comprehensive digital signature of a proteome that can be analysed  
194 again. Since this is clearly desirable, and for this to become a more common practice, best-practice for systematic reanalyses  
195 are needed to establish as well as a common reference framework. However, the complexity of a SWATH-MS study data  
196 analysis can be overwhelming. A common, ready-made pipeline lowers the entry threshold for the analysis of unseen datasets  
197 – both factors which motivated this study. Hence, in this paper, we report, to the best of our knowledge, the first systematic

198 effort to enable the reanalysis and integration of the results of this type of studies. The implemented open reanalysis pipeline  
199 produces overall robust results and provides sufficient flexibility for users to adjust to different reanalysis scenarios.

200 Due to the differing experimental designs currently available, it is hard to formalise a completely generic downstream  
201 analysis workflow. However, a good compromise could be reached by designing the statistical analysis part of the pipeline  
202 using MSstats' dataProcess and further data adjustments such as normalisation and filtering done using R. From a technical  
203 perspective, the additionally implemented entry points to the first Nextflow workflow (Figure 1b) for pre-processed data (e.g.,  
204 OpenSWATH output files) proved to be advantageous, since analyses that follow the initial SWATH-MS data analysis step  
205 often needed to be tested with different parameter settings. The Nextflow configuration of iteratively repeating failed jobs with  
206 an increased memory request was also found to be advantageous. The most influential variables on memory requirements  
207 for the analysis depended on vastly differing settings between the individual studies, including liquid Chromatography (LC)  
208 gradient length, sample content, and of course the study size. HPC compute environments appear as the logical choice for data  
209 (re-)analysis efforts without clear resource requirement boundaries. However, research institutions' collaborations with private  
210 cloud systems are becoming increasingly popular (e.g. OpenStack). SWATH-MS data analysis in the cloud, as showcased  
211 by Peters et al.<sup>31</sup>, can result in greatly increased compute costs, when applied to a broad basis of inputs but without the close  
212 knowledge of the dataset as the data producing lab would have - like with the datasets chosen in this study. DIA analyses are  
213 also inherently disk-intensive processes due to the size of the MS runs and the spread of analysis features throughout the data  
214 (window sequences). This, too, is an often-overlooked contributor to compute cost, especially in cloud compute environments,  
215 where storage and volume of uploaded/downloaded data are usually billed separately. The interrogation of *.wiff/.scan* files  
216 is, as with any other proprietary raw file formats, bound to many constraints. Inspection either needs proprietary software  
217 (e.g. Microsoft Windows), conversion into an open format which takes considerable time and disk space or is otherwise not  
218 compatible with an automated high throughput. It should be noted in this context that additional open analysis pipelines for  
219 DIA datasets have been recently developed using NextFlow<sup>32</sup> and Galaxy<sup>33</sup> as the workflow management systems.

220 During the initial selection of public datasets from PRIDE for reanalysis, we realised that a great proportion did not have  
221 (completely) paired *.wiff/.scan* files, rendering the unpaired samples unusable. At that point, complete pairing was made  
222 mandatory when submitting new SWATH-MS datasets to PRIDE. We hope this will help reanalysis efforts in the future, since  
223 it is essential information reflecting the experimental design as used in the original publication. Mapping raw file names in  
224 PRIDE to the samples in the original publication was done manually and it constituted one of the most time-consuming steps in  
225 this work. In the context of the activities of the Proteomics Standards Initiative, a standard file format called SDRF-Proteomics  
226 (Sample and Data Relationship Format-Proteomics) file (as part of the file format MAGE-TAB-Proteomics) has been formalised  
227 recently<sup>34</sup> for capturing the experimental design in proteomics experiments<sup>3</sup>, and we have started working in the related tooling  
228 to facilitate the creation of these files. It is important to highlight that submission of SDRF-Proteomics files is already supported  
229 by PRIDE, although it is optional at the time of writing. The authors encourage data submitters to align and improve efforts to  
230 match metadata referenced in a publication with the underlying data and make the experimental design an explicit part of any  
231 publication. In any case, concrete and consistent name-and-group mapping tables are already of great help to any reanalysis  
232 or replication effort and increase the transparency of any original publication and therefore its value to the community. The  
233 annotation of the used iRT peptides, too, is crucial to DIA data (re-)analysis efforts. Indeed, detection of the iRT peptides is  
234 essential to their success. We consider this part of QA an important step during measurement acquisition or the reanalysis  
235 process.

236 We deployed the CAL target library in combination with a 1% FDR level threshold for global peptide and protein quantitation  
237 as an appropriate common setting for our reanalyses. This sometimes generated relatively low numbers of proteins quantified  
238 (when compared to the results from custom-made target libraries used in the original publications). This could be attributed  
239 to the limited number of target (peptide fragment ion) features available for some proteins in CAL. For example, the filtered  
240 CAL used for the plasma dataset reduced the number of detected proteins by over half compared to the original study. Hence,  
241 we consider the reduction of the target space for more specialised samples such as biofluids like plasma to warrant further  
242 customisation to the analysis procedure, as opposed to the *generic* application of CAL to the rest of the datasets. However,  
243 the trade-off merits between comprehensive libraries and specialised ones are beyond the scope of this initial study, and we  
244 consider the 'core' of UniProtKB/Swiss-Prot proteins present in CAL to be appropriate for a large proportion of human tissue  
245 and cell line studies. Other strategies for future reanalysis efforts could be the use of 'library-free' approaches<sup>35-37</sup> and/or *in*  
246 *silico* predicted libraries<sup>38,39</sup>. These approaches are starting to get more popular in the field, however when this study was  
247 designed, we chose the more established open data analysis approach, which remains the most frequently used approach to date.  
248 Of course, different analysis software tools could also be used for spectral library-based approaches (e.g. Demichev et al.<sup>30</sup>)  
249 and we also note an extensive benchmarking study of DIA-tools was published recently<sup>40</sup>.

250 As noted, the reanalysis pipeline produced different results compared to the original published studies. However, there  
251 was a good level of agreement between replicates within each dataset, as measured by the CV values, demonstrating a robust,  
252 self-consistent quantification methodology. There was also a basic agreement between the analyses at a fold-change level, with

253 a sufficient overlap and preservation of the general trends. However, the overlaps between the discrete sets of proteins classed  
254 as differentially expressed was often modest. We ascribe this to the large choice of parameters involved in the generation of  
255 differential expression results (independently of the analysis software used) and the serial nature of the different steps of the  
256 whole quantitative pipeline. Initial steps and choice of cut-offs (like differences in peptides detected) can become amplified to  
257 generate a large difference in later results. As shown with the (lack of) overlap in significantly different protein abundances  
258 (Supplementary Table S1), we were only partially successful in reproducing the results of the original studies.

259 The DIA-MS reanalyses provided a large overlap in detected peptides (Supplementary Figure S5, panels d, f) and a similarly  
260 substantial overlap in detected proteins (Supplementary Figure S5, panels g, i), despite the limited overlap in spectral library  
261 target peptides (Supplementary Figure S5, panels a, c). From the peptide and protein detection overlaps alone, one would not  
262 expect a large difference in the detected significantly regulated proteins (see 'Results' section). This suggests that the incomplete  
263 spectral library overlap is at the basis of that discrepancy, and the use of different spectral library peptides and associated  
264 transitions of peptide ions leads to the difference in quantitative results. At first in contrast to these overlaps, the small overlap  
265 of peptides in dataset PXD014943 (Supplementary Figure S5, panel e) is unexpected given that the spectral libraries used in  
266 both original and reanalysis were the same (Supplementary Figure S5, panel b). However, upon closer inspection, this could be  
267 explained by the fact that the originally reported peptides could have been filtered to a one-peptide-per-protein representation  
268 (in the original publication data), as the detected proteins reported showed a larger overlap (Supplementary Figure S5, panel  
269 h). Additionally, the dataset PXD014943 showed one of the bigger overlaps in the list of differentially regulated proteins  
270 (Supplementary Table S1). This leads to the conclusion that the spectral library composition plays a major role, but other  
271 parameters of the analysis also are important for protein detection, and further downstream in protein quantification. In fact, we  
272 can highlight one parameter in particular, that has shown a very strong impact on protein quantification values, the method of  
273 protein inference (Supplementary Figure S4, Supplementary Tables S3, S2). We chose the 'top3' method in MSstats, which  
274 increased the number of confidently detected proteins and regulated proteins. We would like to strongly encourage future studies  
275 to include details and discussion on the method of protein inference to better guide the understanding of presented results to the  
276 community. It should also be noted that other differences in methodology, software, and representation of the experimental  
277 design of the original study, as detailed in the Methods section, could also be the reason behind the result deviations.

278 Here we wanted to study feasibility of DIA-MS (re-)analysis with a generic spectral library on a broad range of human  
279 datasets. However, the analysis stability is dependent on the use of same or similar spectral libraries (in addition to the  
280 acquisition parameters). As shown in this study, and as it should be expected, quantification will vary on the same dataset using  
281 different spectral library peptides and associated transitions of peptide ions. The custom (expert) choice of certain peptide ions  
282 to include can substantially change the quantitative values observed. For consistent reanalysis pipelines it would be undesirable  
283 to choose a custom spectral library for every case, and a stable set of peptides and associated transitions of peptide ions are  
284 required for robust results. Our reanalysis results have been made available via Expression Atlas, thereby offering a convenient  
285 route to integrate DDA and DIA proteomics expression data with transcriptomics data in the same resource. We hope this will  
286 help popularise proteomics approaches in general and DIA approaches in particular, especially for non-proteomics researchers.  
287 Finally, the integration of qualitative and quantitative data from complementary *omics* techniques is, in our view, vital for  
288 having a broadened understanding of the underlying biological processes in different organisms.

## 289 **Methods**

### 290 **Selection of public DIA proteomics datasets and manual curation**

291 After performing an initial selection of publicly available SWATH-MS datasets from PRIDE<sup>3</sup> (all measured from human  
292 samples with SCIEX instruments), 10 datasets were selected with a preference for studies with technical replicates. Further  
293 criteria for reanalysis inclusion were the completeness of data in terms of the necessary files and data types, including both  
294 *.wiff* and *.scan* files, existing annotation of the used iRT peptides, and further MS run information, to be able to reconstruct  
295 the studies' experimental design. In all cases, each dataset was manually curated to extract the main analysis characteristics,  
296 the processing parameters, the experimental design and sample characteristics. The biological metadata for each dataset was  
297 captured in a SDRF file. Then, the raw data files from the selected 10 datasets (Table 1) were downloaded and used as input for  
298 the reanalysis (Figure 1a). The main characteristics of the selected 10 datasets are summarised below.

#### 299 **HCCpct (PXD004873)**

300 This dataset consisted of 76 PCT-SWATH runs from 19 HCC patients' hepatectomies<sup>41</sup>. In the original analysis, overall 38  
301 tissue samples (pairs of benign and tumorous tissues) were prepared, spiked with iRT peptides and measured with a 5600  
302 TripleTOF instrument over a 45 min LC gradient, in technical replicates. The CAL library was used with the iPortal<sup>42</sup> software,  
303 resulting in 2,579 quantified proteins.

304 **DigitalKidney (PXD000672)**

305 This kidney dataset consisted of 48 SWATH-MS runs. In the original analysis, 18 kidney tissue samples were processed as  
306 benign and tumorous pairs coming from 9 patients with renal cell carcinoma (RCC), six of which were classified as clear-cell  
307 RCC (ccRCC), two were classified as papillary RCC (pRCC) and one as chromophobe RCC<sup>16</sup>. Additionally, 4 digests of human  
308 kidney tissue were processed in triplicate (twelve aliquots). The processing included spiking with iRT peptides. Data acquisition  
309 was performed on a 5600 TripleTOF mass spectrometer over a 120 min LC gradient. The custom target library used contained  
310 targets from 41,542 proteotypic peptides, coming from 4,624 proteins, compiled using the TPP<sup>43</sup> (TransProteomicPipeline) on  
311 a DDA analysis of kidney tissues. Using an FDR of 0.1% at a precursor level, 1,632 unique proteins were originally quantified  
312 with iPortal.

313 **BankPrCa (PXD004691)**

314 This dataset contained 224 SWATH-MS runs coming from prostate cancer (PrCa) biopsies<sup>44</sup>. The tissues samples were either  
315 fresh frozen (FF) or formalin-fixed-paraffin-embedded before pressure cycling technology (PCT) was used in the original  
316 analysis. All samples were spiked with iRT peptides (Biognosys<sup>22</sup>) before injection. Data acquisition was performed on a 5600  
317 TripleTOF mass spectrometer with a 30 min LC gradient, with technical replicates. DIA analysis was performed with a custom  
318 spectral library (70,981 peptide precursors from 6,686 UniProtKB/Swiss-Prot proteins) compiled from unfractionated prostate  
319 tissue digests (PCT) and measured in DDA mode on the same type of instrument, over a 2 h gradient. The analysis software  
320 used was OpenSWATH and iPortal. The original analysis resulted in 3,030 detected proteins and a median CV of 16.2%.

321 **Wylm (PXD014943)**

322 This PCT-SWATH dataset came from diffuse large B-cell lymphoma (DLBCL)<sup>44</sup>. In the original analysis, the samples were  
323 prepared from FFPE and spiked with iRT peptides before the MS data measurement took place. The dataset contained 113 runs,  
324 acquired on a 6600 TripleTOF mass spectrometer with a 60 min LC gradient, in technical duplicates. The original data analysis  
325 was conducted using a custom target spectral library with iPortal and resulted in 5,769 proteins detected.

326 **PrCaRegions (PXD003497)**

327 This dataset included 60 PCT-SWATH-MS runs coming from prostatectomies of three individuals<sup>26</sup>. The tissue samples  
328 included acinar prostate tumours and a ductal prostate tumour. Prepared samples were spiked with iRT peptides. Data  
329 acquisition was performed on a 5600 TripleTOF mass spectrometer with a 120 min LC gradient, with technical replicates  
330 for each selected region of the prostatectomies. The target spectral library used for the original analysis was compiled by  
331 combining targets from prostate tissue digest runs and the DDA files from the pan-human combined assay library (CAL). In the  
332 original analysis, performed with OpenSWATH and TRIC, 6,873 proteins were reported to be consistently quantified, 3,700  
333 proteins of those with a high level of correlation. The dataset included additional SWATH-MS runs of 36 human liver S9  
334 fractions (HLS9) samples and three pooled human liver microsomes (HLM) acquired with the same instrumentation but using a  
335 45 min LC gradient.

336 **PrCaNetwork (PXD004589)**

337 This dataset contained 210 SWATH-MS runs from PrCa tissue<sup>45</sup>. The tissue material was sourced from 39 individuals. The  
338 sample preparation was performed with PCT and spiked with 10% iRT peptides. Data acquisition was performed on a 5600  
339 TripleTOF mass spectrometer, with a 120 min LC gradient with technical replicates. The analysis target library was custom  
340 built from 422 DDA MS runs of prostate tissue samples. The original data analysis was performed with OpenSWATH and  
341 TRIC, and overall 2,371 quantified proteins were reported.

342 **BraCaOFLM4 (PXD014194)**

343 This dataset contained 52 breast cancer (BrCa) samples, consisting of 13 estrogen receptor and/or progesterone receptor  
344 (ERPR) positive cases, 13 Her2 (Her) positive, 13 estrogen/progesterone/her2 (ERPRHer) positive, and 13 triple negative (TN)  
345 breast tumours, and a cohort of 20 ductal carcinoma in situ (DCIS) samples<sup>46</sup>. Overall, 145 SWATH-MS runs were prepared  
346 from FFPE samples, measured on a 5600+ TripleTOF mass spectrometer, using a 95 min LC gradient. A custom spectral  
347 library containing 3,200 proteins was used in the original analysis performed with Spectronaut PulsarX12 software (Biognosys,  
348 Schlieren, Aargau, Switzerland), and resulted in 1,313 detected proteins, of which 1,064 were consistently quantified.

349 **NCI-60 (PXD003539)**

350 This dataset titled 'Quantitative Proteome Landscape of the NCI-60 Cancer Cell Lines' consisted of a cell line panel that  
351 contained 60 cell lines coming from 9 different tissue types<sup>47</sup>. Each cell line was measured in technical duplicates. The software  
352 used for the original analysis was OpenSWATH, with MAYU<sup>48</sup> and DIA-expert<sup>49</sup>. The 120 MS runs were acquired with the  
353 PCT-SWATH method on a 5600 TripleTOF mass spectrometer with a 120 min LC gradient. A custom target spectral library  
354 from DDA MS runs obtained from the same samples (containing 86,209 proteotypic peptide precursors in 8,056 proteotypic

355 UniProtKB/Swiss-Prot proteins) was created, resulting in 3,171 consistently detected proteins at a <1% peptide and protein  
356 FDR level (with all proteins detected in technical replicates).

### 357 **Plasma (PXD001064)**

358 Aiming to use a dataset with a more complex expected variation, a twin study design dataset including longitudinal factors, was  
359 also selected<sup>50</sup>. It contained 240 SWATH-MS runs measured on a 5600+ TripleTOF mass spectrometer with a 120 min LC  
360 gradient. Of these, 234 were measured from blood sample pairs of 72 monozygotic and 44 dizygotic twins, ranging from 38  
361 to 74 years of age. An additional 6 MS runs were measured from pooled samples as technical replicates. The sampling was  
362 done at two different time points:  $5.2 \pm 1.4$  years apart. Originally, a custom target spectral library was created for the original  
363 analysis, containing targets coming from 652 proteins detected in mixed plasma samples using DDA experiments and CAL,  
364 resulting in targets representing 1,667 unique plasma proteins. An average of 425 proteins were identified using OpenSWATH,  
365 342 of which were consistently quantified in each twin sample at a 1% protein FDR.

### 366 **DIATPA (PXD010912)**

367 This human liver dataset consisted of overall 43 SWATH-MS runs<sup>51</sup>. From these 43 runs, 36 were measured from individual  
368 human liver S9 fraction (HLS9) samples sourced from 17 males and 19 females, aged 23-81 years, 3 MS runs of pooled HLS9  
369 samples from the same cohort, and 3 MS runs from pooled human liver microsomes (HLM) from 100 males and 100 females,  
370 aged 11-83 years. Analysis was done on a 5600+ TripleTOF mass spectrometer with a 90 min LC gradient. A custom target  
371 spectral library was constructed from DDA runs of the cohort of 36 samples. At a 1% protein FDR, on average, 1,250 proteins  
372 were quantified per each HLS9 sample in the original analysis using Spectronaut Pulsar software (version 11.0, Biognosys).

### 373 **SWATH-MS data analysis**

374 The data analysis workflows were constructed using Nextflow. This choice allowed the data processing to be executed either in  
375 single-computer mode, on HPC clusters, or on cloud computing platforms. The SWATH-MS data analysis workflow steps  
376 (Figure 1b,c) can be broken down into raw data conversion, QC/QA and SWATH-MS window processing, OpenSWATH target  
377 generation and data analysis, FDR analysis and multi-run alignment with PyProphet<sup>23</sup> and TRIC<sup>52</sup> (Figure 1b), followed by a  
378 separate workflow for statistical analysis performed with R and MSstats (Figure 1c), concluded by result inspection and upload  
379 to Expression Atlas via custom submission scripts (Figure 1d). The workflows included in the pipeline were built for top-to-  
380 bottom analysis, starting with the conversion of the raw instrument data, followed by the statistical data processing with MSstats.  
381 The Nextflow workflows were split after the multi-run alignment step and equipped with optional entry points for pre-processed  
382 data from OpenSWATH<sup>12</sup> (.osw files) to enable more flexible compute settings. All analysis software was containerised either  
383 from available software releases or built-for-purpose to ensure a well-defined compute environment and software compatibility.  
384 All container 'recipes' are included in the GitHub repository (<https://github.com/PRIDE-reanalysis/DIA-reanalysis>) and can be  
385 rebuilt for local use (see Table 3).

386 The inputs (Table 4) for the Nextflow pipeline consisted of the SWATH-MS runs as a collection of *.wiff.scan* files, together  
387 with a descriptor file in *.TraML* format, detailing the iRT peptides used. As target input, the pipeline consumes a target spectral  
388 library file in an OpenSWATH conformant *.tsv* format. In case tool parameters needed changing, an additional *.yaml* file can  
389 be provided with updated parameters settings. If a target library in *.pqp* format had already been created or the analysis of  
390 processed *.osw* files had already been conducted with different downstream parameters (FDR thresholds), these could be used  
391 as alternative entry points in the Nextflow workflow. For the last Nextflow workflow, the study design in an MSstats conformant  
392 format must also be provided.

### 393 **Target spectral library and FDR control and statistical analysis**

394 As target spectral library input for the analysis, we used CAL, which was originally envisioned as a generic large-scale human  
395 assay library to support human SWATH-MS studies. It consists of 1,164,312 transitions identifying 139,449 proteotypic peptides  
396 and 10,316 proteins, considering only non-redundant entries of UniProtKB/Swiss-Prot. It therefore supports the detection  
397 and quantification of 50.9% of all human proteins<sup>15</sup>, as annotated by UniProtKB/Swiss-Prot. It was generated by combining  
398 the results from 331 measurements of fractions from different sample types with a technical variation between replicates  
399 of below 20% for the quantified signals at a precursor level. For the 'Plasma' dataset, CAL was filtered for blood/plasma  
400 proteins (as annotated in UniProtKB/Swiss-Prot) to reflect the changed base assumption of potentially present proteins. Protein  
401 identification was performed with OpenSWATH and PyProphet as described in [<sup>23,53</sup>]. PyProphet was used to calculate the  
402 confidence scores on peptide level (global context) and protein level (global context) in parallel at the given FDR thresholds.  
403 Decoys were generated with the OpenSWATH tool OpenSwathDecoyGenerator (using default parameters) and the target library  
404 assay was customised to the input dataset's SWATH-MS window setting with OpenSWATHAssayGenerator.

405 The proteomic analyses were performed at distinct levels (5%, 1% and 0.1%) of peptide and protein FDR, and TRIC was  
406 used to align the SWATH-MS runs detected features. The results were then post-processed with MSstats for protein inference



407 and quantitative analysis. As protein inference method, the 'top3' method was chosen (for the impact of choosing the default  
408 'all' protein inference method, see the 'Results' section and Supplementary Figure S4). The abundance values were median  
409 normalised and  $\log_2$  transformed. Normalisation using MSstats methodology was replaced by a more conservative median  
410 normalisation approach. Furthermore, a consistency filter was also applied to filter out proteins with  $\leq 50\%$  of all target features  
411 of the protein detected over the respective study groups' MS runs. If the study included multiple study groups and protein  
412 expression contrasts of biological interest, additionally, a differential expression analysis was performed, and fold-change  
413 contrasts were calculated (see Table 1, 'Analysis type' column) between study groups. Between the respective groups, the  
414 protein  $\log_2$  fold-change was computed from the mean of each group's expression value and the significance level controlled  
415 ( $\alpha = 0.05$ , R software, Welch t-test, Benjamini & Hochberg).

#### 416 **Technical validation**

417 The resulting protein abundances amongst technical replicates were used to calculate the CV for the datasets. The median CV  
418 was calculated per study group and subject, from the median CV for protein abundances in each pair of technical replications  
419 and compared to the initially reported CV (Figure 3). For each reanalysed dataset containing technical replicates, the correlation  
420 of each study's pairs of technical replicates was also investigated (Figure 4). Where available, we additionally analysed the  
421 correlation of originally reported protein abundances against our reanalysis results. The correlations were measured with the  
422 Pearson product-moment correlation coefficient.

#### 423 **Integration of the results in Expression Atlas**

424 The data integration into Expression Atlas was performed on the results filtered with an FDR threshold of 1% from global context  
425 peptide and protein FDR. The MyGene.info R client (version 1.24.0, Ensembl 99/GRCh38) was used to map UniProtKB/Swiss-  
426 Prot protein accessions to Ensembl gene IDs. Protein groups with mappings to more than one Ensembl gene ID or decoys and  
427 targets without mappings were removed. The filtered and median normalised quantitative results per MS run were integrated  
428 into Expression Atlas. In the case of differential datasets, the  $\log_2$  fold-changes with  $-\log_{10}$  p-values (adjusted) were also  
429 submitted with information on the compared sample groups instead. The corresponding annotated SDRF files are also available.  
430 Expression Atlas URLs for each dataset are indicated in Table 1.

#### 431 **Data availability**

432 All input data was downloaded from PRIDE. Experimental design annotations (*.sdrf*, *.txt*) and reanalysis outputs are available  
433 in the reanalysis repository under the respective *PXD* folder. Table 1 contains the collected information on the datasets, Table 5  
434 information on the result availability, Supplementary Table S4 intermediate result availability.

#### 435 **Code availability**

436 The complete open reanalysis pipeline description and documentation, workflows, container recipes, and custom code and  
437 visualisation scripts, as well as parameter input files are available through the GitHub repository at  
438 <https://github.com/PRIDE-reanalysis/DIA-reanalysis> .

#### 439 **Acknowledgements**

440 We would like to thank all data submitters who made their datasets available in PRIDE. This work has been funded by the  
441 BBSRC grant 'Proteomics-DIA' [grant numbers BB/P024599/1 and BB/P024424/1]. The authors would also like to thank  
442 H. Roest for his help in the implementation of the analysis pipeline. JAV, AP and DGS would also like to acknowledge The  
443 Wellcome Trust [grant number 208391/Z/17/Z], the EU H2020 grant 'EPIC-XS' [grant number 823839] and EMBL-core  
444 funding.

#### 445 **Author contributions statement**

446 M.W., A.P., and D.G.S. designed the analysis pipeline, A.P., D.G.S. and M.W. analysed the datasets and integrated the results  
447 into Expression Atlas. P.B, P.C., R.L.G. S.J.H, and J.A.V. consulted on the pipeline development, N.G., S.M., P.M., and I.P.  
448 contributed to the integration of the data in Expression Atlas. S.J.H, R.L.G. and J.A.V. acquired the funding. M.W, S.J.H., and  
449 J.A.V. wrote the manuscript. All authors reviewed the manuscript.

#### 450 **Competing interests**

451 The authors declare that there is no conflict of interest.

452 **Figures & Tables**

**Table 1.** Main characteristics of the selected public DIA datasets for data reanalysis. Further details can be found in the 'Data availability' section.

| Dataset Identifier      | Analysis Type | Short Name     | Dataset Size (MS runs) | Technical Replicates     | Expression Atlas Accession Number |
|-------------------------|---------------|----------------|------------------------|--------------------------|-----------------------------------|
| PXD004873 <sup>54</sup> | Baseline      | HCCpct         | 76                     | Available                | E-PROT-69                         |
| PXD000672 <sup>55</sup> | Differential  | Digital Kidney | 48                     | Not available            | E-PROT-59                         |
| PXD004691 <sup>56</sup> | Differential  | Bank PrCa      | 224                    | Available                | E-PROT-68                         |
| PXD014943 <sup>57</sup> | Differential  | Wylm           | 113                    | Not available            | E-PROT-67                         |
| PXD003497 <sup>58</sup> | Baseline      | PrCa Regions   | 60                     | Available                | E-PROT-66                         |
| PXD004589 <sup>59</sup> | Baseline      | PrCa Network   | 210                    | Not available            | E-PROT-70                         |
| PXD014194 <sup>60</sup> | Baseline      | BraCa OFLM4    | 145                    | Available                | E-PROT-72                         |
| PXD003539 <sup>61</sup> | Baseline      | NCI60          | 120                    | Not available            | E-PROT-73                         |
| PXD001064 <sup>62</sup> | Baseline      | Plasma         | 240                    | Pooled sample replicates | E-PROT-60                         |
| PXD010912 <sup>63</sup> | Baseline      | DIATPA         | 42                     | Not available            | E-PROT-71                         |

**Table 2.** Median CV values for technical replicates, for the reanalysed results and originally published data, respectively.

| Dataset identifier | Reanalysed data | Original data |
|--------------------|-----------------|---------------|
| PXD014194          | 16.8            | 19.0          |
| PXD004873          | 7.14            | 6.05          |
| PXD003497          | 20.8            | 20.3          |

**Table 3.** Overview of the containers and software versions used in the open data analysis pipeline.

| Step                             | Name           | URL or DockerHub handle                                                                                                                                                             | Version                   |
|----------------------------------|----------------|-------------------------------------------------------------------------------------------------------------------------------------------------------------------------------------|---------------------------|
| Conversion from raw file to mzML | wiffConverter  | sciex/wiffconverter:0.7                                                                                                                                                             | 0.7.0                     |
| QC/QA                            | yamato         | <a href="https://github.com/PaulBrack/Yamato/releases/download/v1.0.4/release-linux-x64.zip">https://github.com/PaulBrack/Yamato/releases/download/v1.0.4/release-linux-x64.zip</a> | 1.0.4                     |
| Window management                | python scripts | <a href="https://github.com/PRIDE-reanalysis/DIA-reanalysis">https://github.com/PRIDE-reanalysis/DIA-reanalysis</a>                                                                 | 1.0.0                     |
| OpenSWATH                        | OpenSWATH      | openswath/Openswath:0.1.2                                                                                                                                                           | 2.4.0 (git 868546e)       |
|                                  | PyProphet      |                                                                                                                                                                                     | 2.0.dev1 (git ddcedac)    |
|                                  | TRIC           |                                                                                                                                                                                     | 0.8.0 (git eeed765)       |
| Post-processing                  | R              | <a href="https://github.com/PRIDE-reanalysis/DIA-reanalysis">https://github.com/PRIDE-reanalysis/DIA-reanalysis</a>                                                                 | 4.0.3                     |
|                                  | MSstats        |                                                                                                                                                                                     | 3.22.0                    |
|                                  | MyGene.info    |                                                                                                                                                                                     | 1.24.0, Ensembl 99/GRCh38 |

**Table 4.** Types of input to the DIA reanalysis pipeline implemented in Nextflow.

|                                                                                                            |
|------------------------------------------------------------------------------------------------------------|
| <b>Analysis pipeline inputs</b>                                                                            |
| An iRT file in OpenSWATH conformant <i>.TraML</i> format                                                   |
| A collection of <i>.wiff.scan</i> files (alternatively pre-processed <i>.osw</i> files)                    |
| Target library file in OpenSWATH conformant <i>.tsv</i> format (alternatively a prepared <i>.pqp</i> file) |
| Study design annotation in MSstats conformant format and SDRF format ( <i>.txt/.sdrf</i> )                 |
| Parameter <i>.yaml</i> file (in case the defaults need to be changed)                                      |
| <b>Output upstream Nextflow</b>                                                                            |
| FDR filtered alignment results of transition quantifications ( <i>.tsv</i> )                               |
| QC records for each MS run ( <i>.json</i> )                                                                |
| <b>Output downstream Nextflow</b>                                                                          |
| MSstats analysis object ( <i>.rda</i> )                                                                    |
| Dataset analysis report ( <i>.pdf</i> )                                                                    |
| Prefiltered Expression Atlas upload input ( <i>.tsv</i> )                                                  |

**Table 5.** Detailed information on the datasets included in the reanalysis. \*The current URLs correspond to the development instance of Expression Atlas. In the next Expression Atlas release, these datasets will be moved to the production instance. At that point links will be updated to the corresponding URLs starting by <https://www.ebi.ac.uk/gxa/experiments/>

| Dataset identifier | Originally reported protein quantification | Condition contrasts available | Condition common Proteins | Expression Atlas URL*                                                                                                               |
|--------------------|--------------------------------------------|-------------------------------|---------------------------|-------------------------------------------------------------------------------------------------------------------------------------|
| PXD004873          | Per MS run                                 | -                             | -                         | <a href="https://wwwdev.ebi.ac.uk/gxa/experiments/E-PROT-69/Results">https://wwwdev.ebi.ac.uk/gxa/experiments/E-PROT-69/Results</a> |
| PXD000672          | Per MS run                                 | 2                             | 975; 1022                 | <a href="https://wwwdev.ebi.ac.uk/gxa/experiments/E-PROT-59/Results">https://wwwdev.ebi.ac.uk/gxa/experiments/E-PROT-59/Results</a> |
| PXD004691          | Per sample                                 | 2                             | 1435; 991                 | <a href="https://wwwdev.ebi.ac.uk/gxa/experiments/E-PROT-68/Results">https://wwwdev.ebi.ac.uk/gxa/experiments/E-PROT-68/Results</a> |
| PXD014943          | Per sample                                 | 2                             | 3019; 1080                | <a href="https://wwwdev.ebi.ac.uk/gxa/experiments/E-PROT-67/Results">https://wwwdev.ebi.ac.uk/gxa/experiments/E-PROT-67/Results</a> |
| PXD003497          | Per MS run                                 | -                             | -                         | <a href="https://wwwdev.ebi.ac.uk/gxa/experiments/E-PROT-66/Results">https://wwwdev.ebi.ac.uk/gxa/experiments/E-PROT-66/Results</a> |
| PXD004589          | Per MS run                                 | -                             | -                         | <a href="https://wwwdev.ebi.ac.uk/gxa/experiments/E-PROT-70/Results">https://wwwdev.ebi.ac.uk/gxa/experiments/E-PROT-70/Results</a> |
| PXD014194          | Per MS run                                 | -                             | -                         | <a href="https://wwwdev.ebi.ac.uk/gxa/experiments/E-PROT-72/Results">https://wwwdev.ebi.ac.uk/gxa/experiments/E-PROT-72/Results</a> |
| PXD003539          | -                                          | -                             | -                         | <a href="https://wwwdev.ebi.ac.uk/gxa/experiments/E-PROT-73/Results">https://wwwdev.ebi.ac.uk/gxa/experiments/E-PROT-73/Results</a> |
| PXD001064          | -                                          | -                             | -                         | <a href="https://wwwdev.ebi.ac.uk/gxa/experiments/E-PROT-60/Results">https://wwwdev.ebi.ac.uk/gxa/experiments/E-PROT-60/Results</a> |
| PXD010912          | -                                          | -                             | -                         | <a href="https://wwwdev.ebi.ac.uk/gxa/experiments/E-PROT-71/Results">https://wwwdev.ebi.ac.uk/gxa/experiments/E-PROT-71/Results</a> |

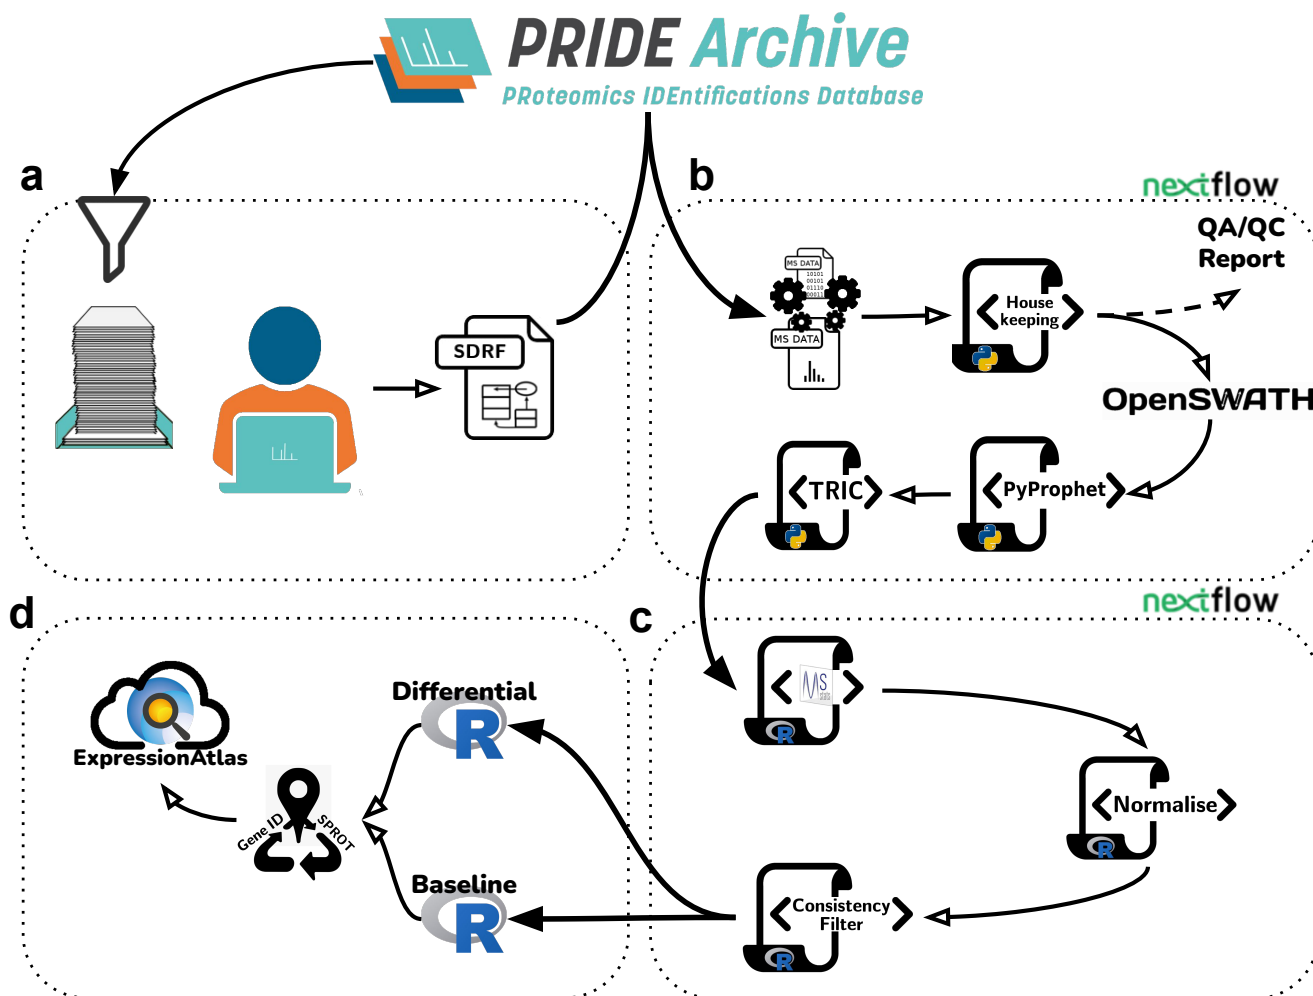

**Figure 1.** Graphical representation of the DIA data reanalysis pipeline, consisting of 4 parts. a) Data curation: Metadata annotation protocols and dataset acquisition. b) SWATH-MS data analysis: Nextflow workflow including steps ranging from data conversion, SWATH-MS window management, data quality assessment and control (QA/QC), OpenSWATH analysis, FDR calculation to measurement alignment. c) Statistical analysis: Nextflow workflow for MSstats analysis, normalisation and result filtering. d) Data integration: Data preparation, accession mapping and integration into Expression Atlas.

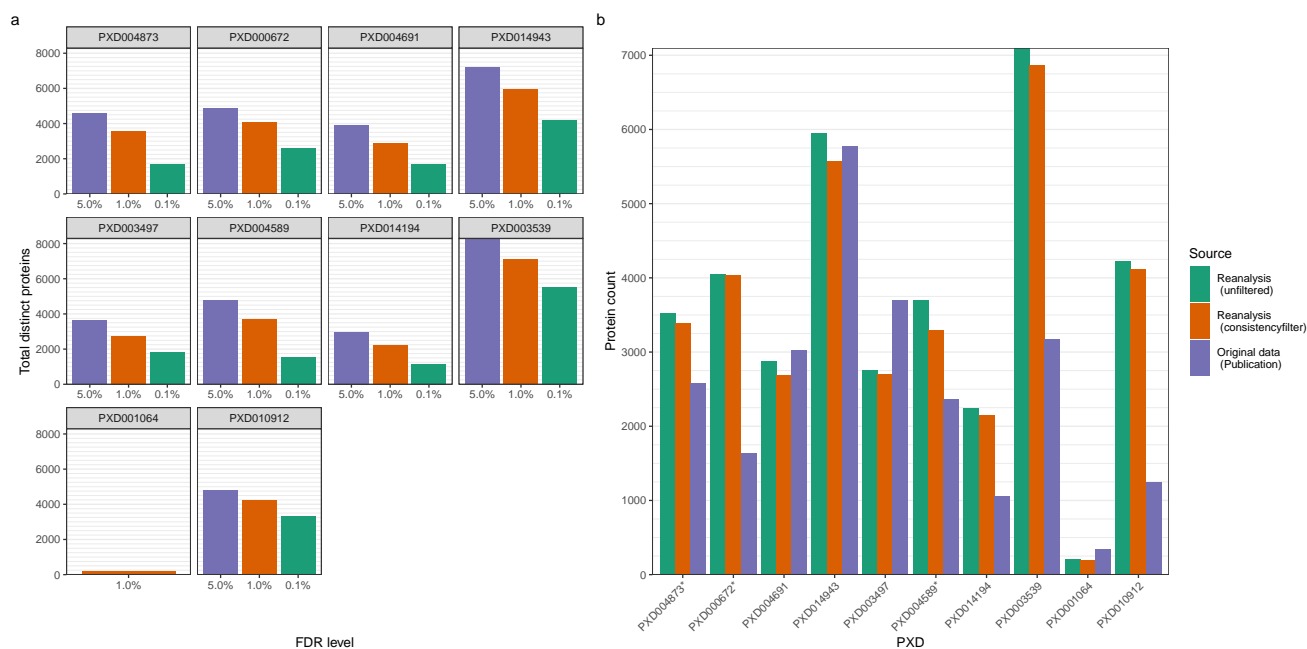

**Figure 2.** a) Number of detected proteins per dataset at different FDR levels in the data reanalysis. a) Protein detection results after 1% protein FDR threshold filtering. Original data refers to the respective publication's mentioned protein numbers, reported at 1% protein FDR unless indicated otherwise. Reanalysis numbers are provided unfiltered and with the consistency filter applied (at least 50% of all protein's peptide fragment targets have to be detected within a study group). \*Proteins coming from datasets PXD000672 and PXD004873 were reported in the original publication at a 0.1% protein level FDR only. In the case of dataset PXD004589 at 0.1% peptide level FDR was reported.

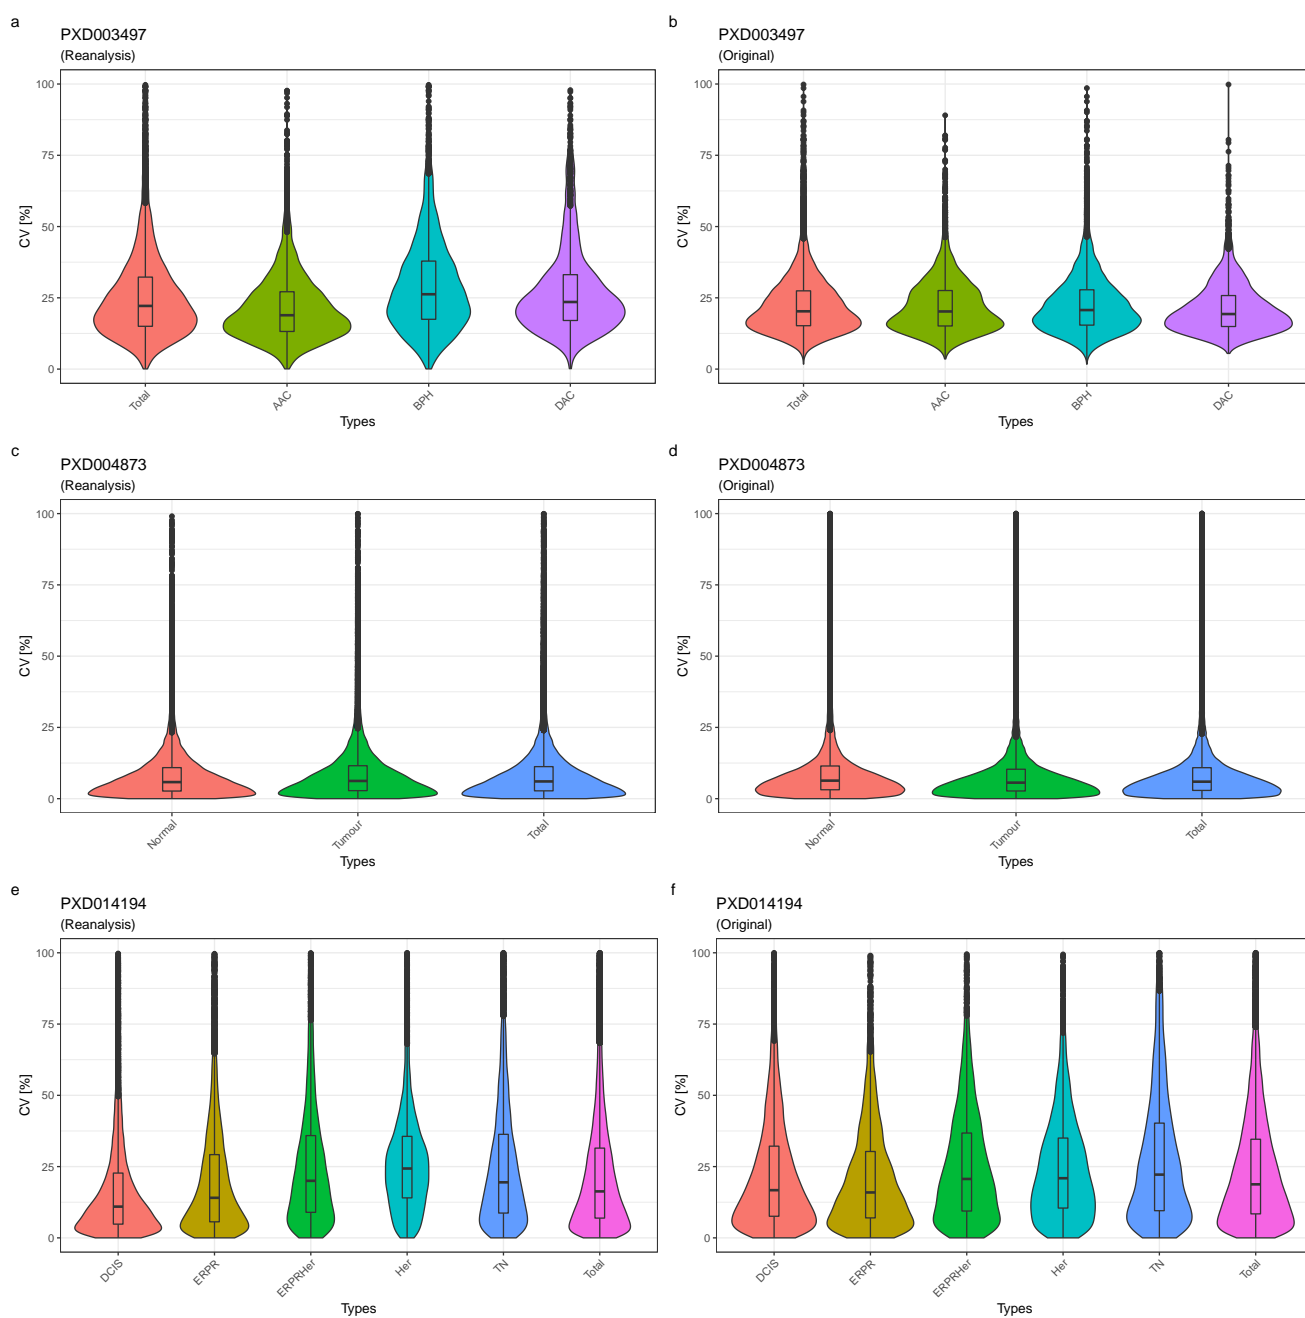

**Figure 3.** Violin-plots showing the results of the group-wise CV comparisons: a) PXD003497 reanalysis; b) PXD003497 original data; c) PXD004873 reanalysis; d) PXD004873 original data; e) PXD014194 reanalysis; f) PXD014194 original data. As it can be seen from the similar size and shapes of the violin-plots, the CVs across the datasets are largely concordant.

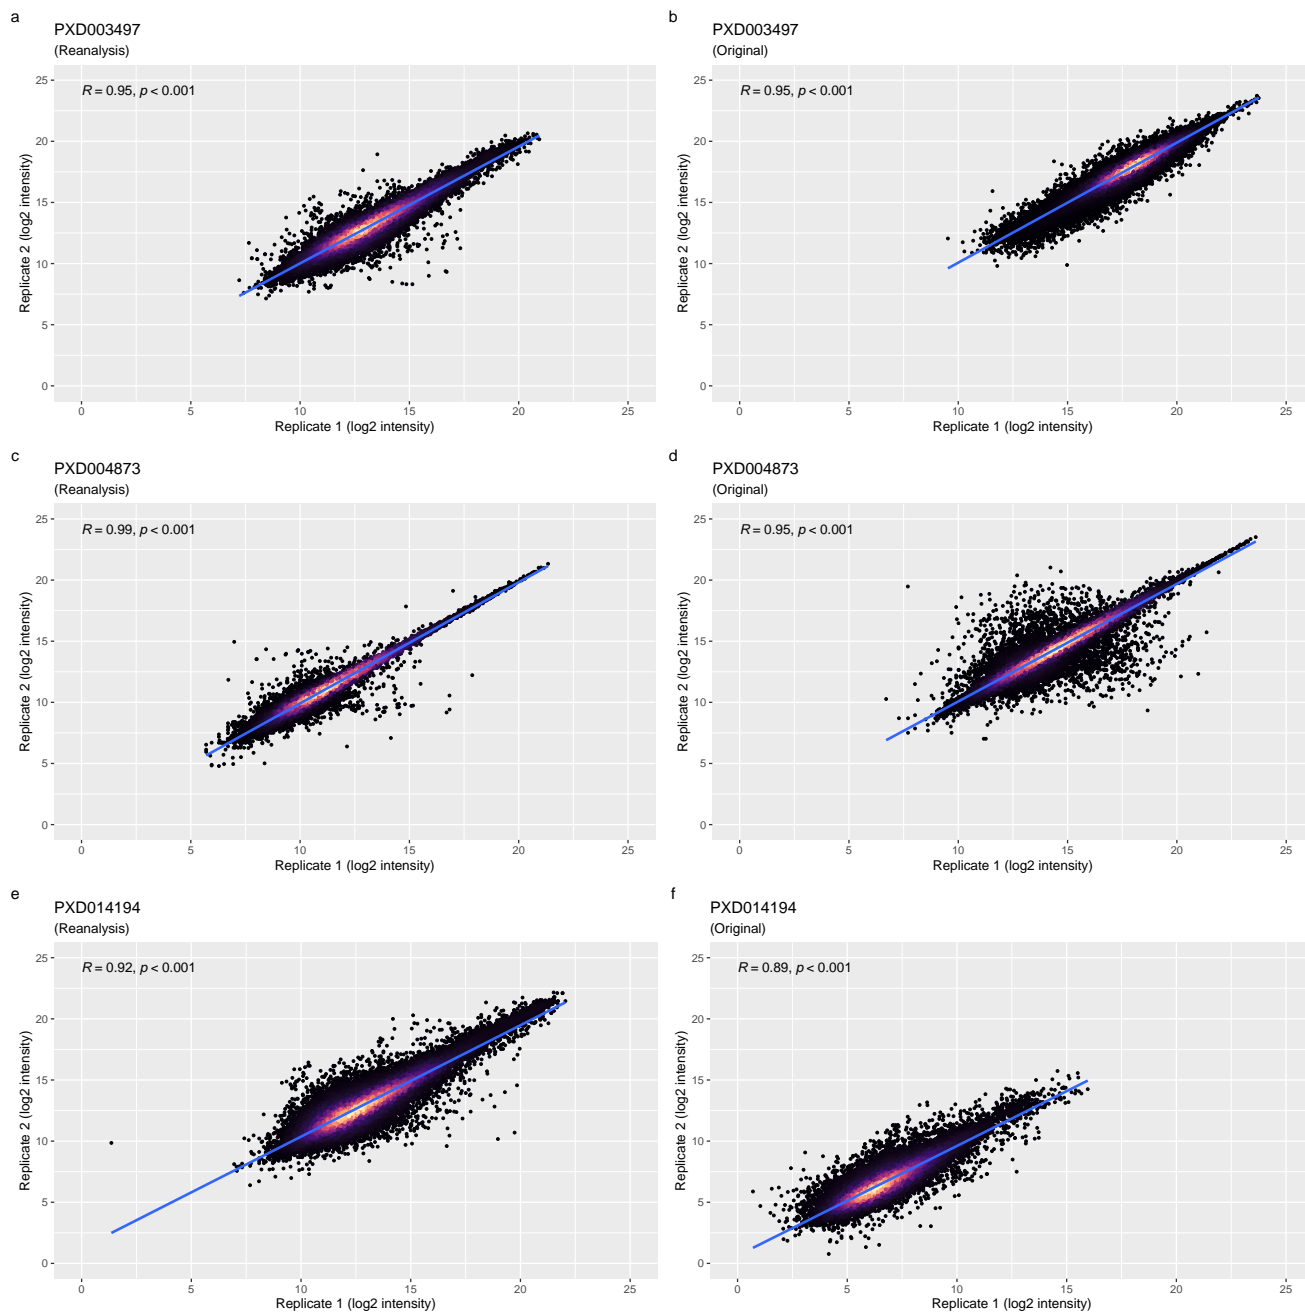

**Figure 4.** Correlation analysis of reported log<sub>2</sub> protein intensities from technical replicate pairs: a) PXD003497 reanalysis; b) PXD003497 original data; c) PXD004873 reanalysis; d) PXD004873 original data; e) PXD014194 reanalysis; f) PXD014194 original data. The first items of pairs are on the x-axis and second items are on the y-axis. Each point represents a protein. The point density is indicated by the colour gradient, with black showing the lowest density. The higher the density the lighter the colour becomes.



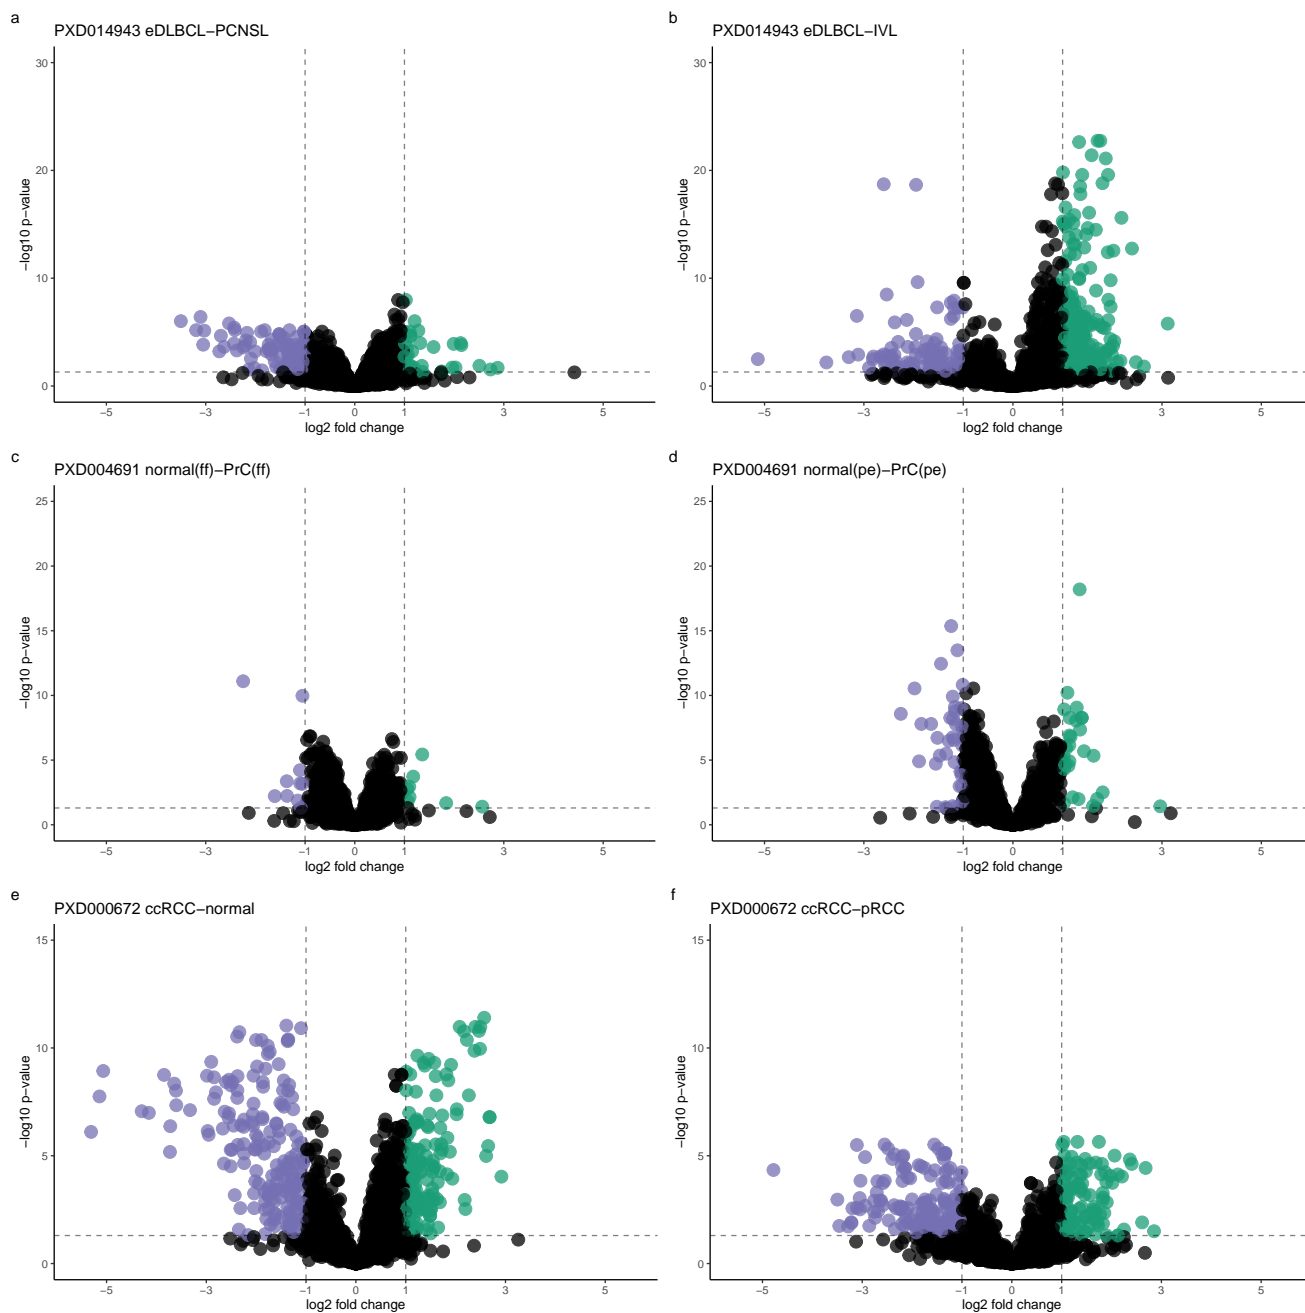

**Figure 5.** Volcano plots corresponding to the differential expression analysis for dataset PXD014943: a) extranodal diffuse large B-cell lymphoma (eDLBCL) versus primary central nervous system lymphoma (PCNSL); b) intravascular lymphoma (IVL) versus eDLBCL. For dataset PXD004691: c) normal tissue (fresh frozen) versus PrC (fresh frozen); d) normal tissue (paraffin embedded) versus tumour tissue (paraffin embedded). For dataset PXD000672: e) benign tissue samples versus clear cell RCC; f) clear cell RCC versus paillary RCC. The FC compared are represented by points on the plot. Significant FC proteins are colour indicated, dashed lines indicate the fold-change cutoff of 2 and the (adjusted) p-value cutoff at 0.05.

## References

- 453 **1.** Rung, J. & Brazma, A. Reuse of public genome-wide gene expression data. *Nat. Rev. Genet.* **14**, 89–99, [10.1038/nrg3394](https://doi.org/10.1038/nrg3394)  
454 (2013).  
455
- 456 **2.** Talavera, D. *et al.* Archetypal transcriptional blocks underpin yeast gene regulation in response to changes in growth  
457 conditions. *Sci. Reports* **8**, 7949, [10.1038/s41598-018-26170-5](https://doi.org/10.1038/s41598-018-26170-5) (2018).
- 458 **3.** Perez-Riverol, Y. & for Mass Spectrometry, E. B. C. Toward a sample metadata standard in public proteomics repositories.  
459 *J. Proteome Res.* **19**, 3906–3909, [10.1021/acs.jproteome.0c00376](https://doi.org/10.1021/acs.jproteome.0c00376) (2020).
- 460 **4.** Deutsch, E. W. *et al.* The ProteomeXchange consortium in 2020: enabling 'big data' approaches in proteomics. *Nucleic  
461 Acids Res.* **48**, D1145–D1152, [10.1093/nar/gkz984](https://doi.org/10.1093/nar/gkz984) (2020).
- 462 **5.** Vaudel, M. *et al.* Exploring the potential of public proteomics data. *Proteomics* **16**, 214–225, [10.1002/pmic.201500295](https://doi.org/10.1002/pmic.201500295)  
463 (2016).
- 464 **6.** Martens, L. & Vizcaino, J. A. A golden age for working with public proteomics data. *Trends Biochem. Sci.* **42**, 333–341,  
465 [10.1016/j.tibs.2017.01.001](https://doi.org/10.1016/j.tibs.2017.01.001) (2017).
- 466 **7.** Ochoa, D. *et al.* The functional landscape of the human phosphoproteome. *Nat. Biotechnol.* **38**, 365–373, [10.1038/  
467 s41587-019-0344-3](https://doi.org/10.1038/s41587-019-0344-3) (2020).
- 468 **8.** Bouwmeester, R., Gabriels, R., Van Den Bossche, T., Martens, L. & Degroeve, S. The age of data-driven proteomics: How  
469 machine learning enables novel workflows. *Proteomics* **20**, e1900351, [10.1002/pmic.201900351](https://doi.org/10.1002/pmic.201900351) (2020).
- 470 **9.** Papatheodorou, I. *et al.* Expression atlas update: from tissues to single cells. *Nucleic Acids Res.* **48**, D77–D83, [10.1093/  
471 nar/gkz947](https://doi.org/10.1093/nar/gkz947) (2020).
- 472 **10.** Jarnuczak, A. F. *et al.* An integrated landscape of protein expression in human cancer. *Sci. data* **8**, 115, [10.1038/  
473 s41597-021-00890-2](https://doi.org/10.1038/s41597-021-00890-2) (2021).
- 474 **11.** Wang, S. *et al.* Integrated view and comparative analysis of baseline protein expression in mouse and rat tissues. *BioRxiv*  
475 [10.1101/2021.12.20.473413](https://doi.org/10.1101/2021.12.20.473413) (2021).
- 476 **12.** Röst, H. L. *et al.* OpenSWATH enables automated, targeted analysis of data-independent acquisition MS data. *Nat.  
477 Biotechnol.* **32**, 219–223, [10.1038/nbt.2841](https://doi.org/10.1038/nbt.2841) (2014).
- 478 **13.** Gillet, L. C. *et al.* Targeted data extraction of the MS/MS spectra generated by data-independent acquisition: a new concept  
479 for consistent and accurate proteome analysis. *Mol. & Cell. Proteomics* **11**, O111.016717, [10.1074/mcp.O111.016717](https://doi.org/10.1074/mcp.O111.016717)  
480 (2012).
- 481 **14.** Ludwig, C. *et al.* Data-independent acquisition-based SWATH-MS for quantitative proteomics: a tutorial. *Mol. Syst. Biol.*  
482 **14**, e8126, [10.15252/msb.20178126](https://doi.org/10.15252/msb.20178126) (2018).
- 483 **15.** Rosenberger, G. *et al.* A repository of assays to quantify 10,000 human proteins by SWATH-MS. *Sci. data* **1**, 140031,  
484 [10.1038/sdata.2014.31](https://doi.org/10.1038/sdata.2014.31) (2014).
- 485 **16.** Guo, T. *et al.* Rapid mass spectrometric conversion of tissue biopsy samples into permanent quantitative digital proteome  
486 maps. *Nat. Medicine* **21**, 407–413, [10.1038/nm.3807](https://doi.org/10.1038/nm.3807) (2015).
- 487 **17.** Selevsek, N. *et al.* Reproducible and consistent quantification of the *Saccharomyces cerevisiae* proteome by SWATH-mass  
488 spectrometry. *Mol. & Cell. Proteomics* **14**, 739–749, [10.1074/mcp.M113.035550](https://doi.org/10.1074/mcp.M113.035550) (2015).
- 489 **18.** Collins, B. C. *et al.* Multi-laboratory assessment of reproducibility, qualitative and quantitative performance of SWATH-  
490 mass spectrometry. *Nat. Commun.* **8**, 291, [10.1038/s41467-017-00249-5](https://doi.org/10.1038/s41467-017-00249-5) (2017).
- 491 **19.** Deutsch, E. W., Lam, H. & Aebersold, R. PeptideAtlas: a resource for target selection for emerging targeted proteomics  
492 workflows. *EMBO Reports* **9**, 429–434, [10.1038/embor.2008.56](https://doi.org/10.1038/embor.2008.56) (2008).
- 493 **20.** Bouchal, P. *et al.* Breast cancer classification based on proteotypes obtained by SWATH mass spectrometry. *Cell reports*  
494 **28**, 832–843.e7, [10.1016/j.celrep.2019.06.046](https://doi.org/10.1016/j.celrep.2019.06.046) (2019).
- 495 **21.** Weerakoon, H. *et al.* A primary human t-cell spectral library to facilitate large scale quantitative t-cell proteomics. *Sci.  
496 data* **7**, 412, [10.1038/s41597-020-00744-3](https://doi.org/10.1038/s41597-020-00744-3) (2020).
- 497 **22.** Escher, C. *et al.* Using iRT, a normalized retention time for more targeted measurement of peptides. *Proteomics* **12**,  
498 1111–1121, [10.1002/pmic.201100463](https://doi.org/10.1002/pmic.201100463) (2012).
- 499 **23.** Rosenberger, G. *et al.* Statistical control of peptide and protein error rates in large-scale targeted data-independent  
500 acquisition analyses. *Nat. Methods* **14**, 921–927, [10.1038/nmeth.4398](https://doi.org/10.1038/nmeth.4398) (2017).

- 501 **24.** Navarro, P. *et al.* A multicenter study benchmarks software tools for label-free proteome quantification. *Nat. Biotechnol.*  
502 **34**, 1130–1136, [10.1038/nbt.3685](https://doi.org/10.1038/nbt.3685) (2016).
- 503 **25.** Di Tommaso, P. *et al.* Nextflow enables reproducible computational workflows. *Nat. Biotechnol.* **35**, 316–319, [10.1038/](https://doi.org/10.1038/nbt.3820)  
504 [nbt.3820](https://doi.org/10.1038/nbt.3820) (2017).
- 505 **26.** Guo, T. *et al.* Multi-region proteome analysis quantifies spatial heterogeneity of prostate tissue biomarkers. *Life Sci.*  
506 *Alliance* **1**, [10.26508/lsa.201800042](https://doi.org/10.26508/lsa.201800042) (2018).
- 507 **27.** Team, R. C. R: A language and environment for statistical computing (2020).
- 508 **28.** Choi, M. *et al.* MSstats: an r package for statistical analysis of quantitative mass spectrometry-based proteomic experiments.  
509 *Bioinformatics* **30**, 2524–2526, [10.1093/bioinformatics/btu305](https://doi.org/10.1093/bioinformatics/btu305) (2014).
- 510 **29.** Tiwary, S. *et al.* High-quality MS/MS spectrum prediction for data-dependent and data-independent acquisition data  
511 analysis. *Nat. Methods* **16**, 519–525, [10.1038/s41592-019-0427-6](https://doi.org/10.1038/s41592-019-0427-6) (2019).
- 512 **30.** Demichev, V., Messner, C. B., Vernardis, S. I., Lilley, K. S. & Ralser, M. DIA-NN: neural networks and interference  
513 correction enable deep proteome coverage in high throughput. *Nat. Methods* **17**, 41–44, [10.1038/s41592-019-0638-x](https://doi.org/10.1038/s41592-019-0638-x)  
514 (2020).
- 515 **31.** Peters, S., Hains, P. G., Lucas, N., Robinson, P. J. & Tully, B. A case study and methodology for openswath parameter  
516 optimization using the procan90 data set and 45810 computational analysis runs. *J. Proteome Res.* **18**, 1019–1031,  
517 [10.1021/acs.jproteome.8b00709](https://doi.org/10.1021/acs.jproteome.8b00709) (2019).
- 518 **32.** Bichmann, L. *et al.* DIAproteomics: A multifunctional data analysis pipeline for data-independent acquisition proteomics  
519 and peptidomics. *J. Proteome Res.* **20**, 3758–3766, [10.1021/acs.jproteome.1c00123](https://doi.org/10.1021/acs.jproteome.1c00123) (2021).
- 520 **33.** Fahrner, M. *et al.* Democratizing data-independent acquisition proteomics analysis on public cloud infrastructures via the  
521 galaxy framework. *GigaScience* **11**, [10.1093/gigascience/giac005](https://doi.org/10.1093/gigascience/giac005) (2022).
- 522 **34.** Dai, C. *et al.* A proteomics sample metadata representation for multiomics integration and big data analysis. *Nat. Commun.*  
523 **12**, 5854, [10.1038/s41467-021-26111-3](https://doi.org/10.1038/s41467-021-26111-3) (2021).
- 524 **35.** Tsou, C.-C. *et al.* DIA-umpire: comprehensive computational framework for data-independent acquisition proteomics.  
525 *Nat. Methods* **12**, 258–64, 7 p following 264, [10.1038/nmeth.3255](https://doi.org/10.1038/nmeth.3255) (2015).
- 526 **36.** Li, Y. *et al.* Group-DIA: analyzing multiple data-independent acquisition mass spectrometry data files. *Nat. Methods* **12**,  
527 1105–1106, [10.1038/nmeth.3593](https://doi.org/10.1038/nmeth.3593) (2015).
- 528 **37.** Mehta, D., Scandola, S. & Uhrig, R. G. BoxCar and library-free data-independent acquisition substantially improve the  
529 depth, range, and completeness of label-free quantitative proteomics in arabidopsis. *BioRxiv* [10.1101/2020.11.07.372276](https://doi.org/10.1101/2020.11.07.372276)  
530 (2021).
- 531 **38.** Yang, Y. *et al.* In silico spectral libraries by deep learning facilitate data-independent acquisition proteomics. *Nat. Commun.*  
532 **11**, 146, [10.1038/s41467-019-13866-z](https://doi.org/10.1038/s41467-019-13866-z) (2020).
- 533 **39.** Van Puyvelde, B. *et al.* Removing the hidden data dependency of DIA with predicted spectral libraries. *Proteomics* **20**,  
534 e1900306, [10.1002/pmic.201900306](https://doi.org/10.1002/pmic.201900306) (2020).
- 535 **40.** Gotti, C. *et al.* Extensive and accurate benchmarking of DIA acquisition methods and software tools using a complex  
536 proteomic standard. *J. Proteome Res.* **20**, 4801–4814, [10.1021/acs.jproteome.1c00490](https://doi.org/10.1021/acs.jproteome.1c00490) (2021).
- 537 **41.** Zhu, Y. *et al.* High-throughput proteomic analysis of FFPE tissue samples facilitates tumor stratification. *Mol. Oncol.* **13**,  
538 2305–2328, [10.1002/1878-0261.12570](https://doi.org/10.1002/1878-0261.12570) (2019).
- 539 **42.** Kunszt, P. *et al.* iPortal: the swiss grid proteomics portal: Requirements and new features based on experience and usability  
540 considerations. *Concurr. Comput. Pract. Exp.* **27**, 433–445, [10.1002/cpe.3294](https://doi.org/10.1002/cpe.3294) (2015).
- 541 **43.** Deutsch, E. W. *et al.* Trans-proteomic pipeline, a standardized data processing pipeline for large-scale reproducible  
542 proteomics informatics. *Proteomics. Clin. Appl.* **9**, 745–754, [10.1002/prca.201400164](https://doi.org/10.1002/prca.201400164) (2015).
- 543 **44.** Zhu, Y. *et al.* Identification of protein abundance changes in hepatocellular carcinoma tissues using PCT-SWATH.  
544 *Proteomics. Clin. Appl.* **13**, e1700179, [10.1002/prca.201700179](https://doi.org/10.1002/prca.201700179) (2019).
- 545 **45.** Charmpi, K. *et al.* Convergent network effects along the axis of gene expression during prostate cancer progression.  
546 *Genome Biol.* **21**, 302, [10.1186/s13059-020-02188-9](https://doi.org/10.1186/s13059-020-02188-9) (2020).
- 547 **46.** Valo, I. *et al.* OLFM4 expression in ductal carcinoma in situ and in invasive breast cancer cohorts by a SWATH-based  
548 proteomic approach. *Proteomics* **19**, e1800446, [10.1002/pmic.201800446](https://doi.org/10.1002/pmic.201800446) (2019).

- 549 **47.** Guo, T. *et al.* Quantitative proteome landscape of the NCI-60 cancer cell lines. *iScience* **21**, 664–680, [10.1016/j.isci.2019.](https://doi.org/10.1016/j.isci.2019.10.059)  
550 [10.059](https://doi.org/10.1016/j.isci.2019.10.059) (2019).
- 551 **48.** Reiter, L. *et al.* Protein identification false discovery rates for very large proteomics data sets generated by tandem mass  
552 spectrometry. *Mol. & Cell. Proteomics* **8**, 2405–2417, [10.1074/mcp.M900317-MCP200](https://doi.org/10.1074/mcp.M900317-MCP200) (2009).
- 553 **49.** GitHub - tiannanguo/dia-expert, <https://github.com/tiannanguo/dia-expert>.
- 554 **50.** Liu, Y. *et al.* Quantitative variability of 342 plasma proteins in a human twin population. *Mol. Syst. Biol.* **11**, 786,  
555 [10.15252/msb.20145728](https://doi.org/10.15252/msb.20145728) (2015).
- 556 **51.** He, B., Shi, J., Wang, X., Jiang, H. & Zhu, H.-J. Label-free absolute protein quantification with data-independent  
557 acquisition. *J. Proteomics* **200**, 51–59, [10.1016/j.jprot.2019.03.005](https://doi.org/10.1016/j.jprot.2019.03.005) (2019).
- 558 **52.** Röst, H. L. *et al.* TRIC: an automated alignment strategy for reproducible protein quantification in targeted proteomics.  
559 *Nat. Methods* **13**, 777–783, [10.1038/nmeth.3954](https://doi.org/10.1038/nmeth.3954) (2016).
- 560 **53.** Röst, H. L., Aebersold, R. & Schubert, O. T. Automated SWATH data analysis using targeted extraction of ion chro-  
561 matograms. *Methods Mol. Biol.* **1550**, 289–307, [10.1007/978-1-4939-6747-6\\_20](https://doi.org/10.1007/978-1-4939-6747-6_20) (2017).
- 562 **54.** Guo, T. & Aebersold, R. 76 human liver tissue proteomes by PCT-SWATH. *PRIDE Arch.* [https://identifiers.org/pride.project:](https://identifiers.org/pride.project:PX0004873)  
563 [PX0004873](https://identifiers.org/pride.project:PX0004873) (2018).
- 564 **55.** Guo, T. & Aebersold, R. PCT-SWATH kidney tissues - rapid mass spectrometric conversion of tissue biopsy samples into  
565 permanent quantitative digital proteome maps. *PRIDE Arch.* <https://identifiers.org/pride.project:PX000672> (2015).
- 566 **56.** Guo, T. & Aebersold, R. Comparison of FFPE and fresh frozen prostate tissues using PCT SWATH. *PRIDE Arch.*  
567 <https://identifiers.org/pride.project:PX0004691> (2019).
- 568 **57.** Blattmann, P. & Aebersold, R. 113 DLBCL SWATH maps by PCT-SWATH. *PRIDE Arch.* [https://identifiers.org/pride.](https://identifiers.org/pride.project:PX0014943)  
569 [project:PX0014943](https://identifiers.org/pride.project:PX0014943) (2019).
- 570 **58.** Guo, T. & Aebersold, R. Quantification of proteome heterogeneity in benign and malignant prostate tissues. *PRIDE Arch.*  
571 <https://identifiers.org/pride.project:PX0003497> (2018).
- 572 **59.** Guo, T. & Aebersold, R. PCP39: prostate cancer proteome for 39 patients by PCT-SWATH. *PRIDE Arch.* [https:](https://identifiers.org/pride.project:PX0004589)  
573 [//identifiers.org/pride.project:PX0004589">//identifiers.org/pride.project:PX0004589](https://identifiers.org/pride.project:PX0004589) (2018).
- 574 **60.** Valo, I. & Guette, C. OLFM4 expression in breast tumor samples. *PRIDE Arch.* [https://i](https://identifiers.org/pride.project:PX0014194)  
575 [dentifiers.org/pride.project:PX0014194](https://identifiers.org/pride.project:PX0014194) (2019).
- 576 **61.** Guo, T. & Aebersold, R. NCI60 proteome by PCT-SWATH - quantitative proteome landscape of the NCI-60 cancer cell  
577 lines. *PRIDE Arch.* <https://identifiers.org/pride.project:PX0003539> (2020).
- 578 **62.** He, B. & Zhu, H.-J. Label-free absolute protein quantification with data-independent acquisition. *PRIDE Arch.* [https:](https://identifiers.org/pride.project:PX0010912)  
579 [//identifiers.org/pride.project:PX0010912">//identifiers.org/pride.project:PX0010912](https://identifiers.org/pride.project:PX0010912) (2019).
- 580 **63.** Liu, Y. & Aebersold, R. Quantitative variability of 342 plasma proteins in a human twin population. *PRIDE Arch.*  
581 <https://identifiers.org/pride.project:PX0001064> (2015).
